# Supplementary material for: Detection of Measurable Residual Disease Biomarkers in Extracellular Vesicles from Liquid Biopsies of Multiple Myeloma Patients—A Proof of Concept
Source: MDPI journal article supplement (doi:10.3390/ijms232213686), 2022-11-08
Supplement: s1 [file s1]

# Detection of measurable residual disease biomarkers in extracellular vesicles from liquid biopsies of Multiple Myeloma patients – a proof of concept

Rui Bergantim <sup>1,2,3,4</sup>, Sara Peixoto da Silva <sup>1,2</sup>, Bárbara Polónia <sup>1,2</sup>, Mélanie A. G. Barbosa <sup>1,2</sup>, André Albergaria <sup>1,5</sup>, Jorge Lima <sup>1,5</sup>, Hugo R. Caires <sup>1,2</sup>, José E. Guimarães <sup>1,2,3,4,6,\*</sup> and M. Helena Vasconcelos <sup>1,2,7,\*</sup>

<sup>1</sup> i3S—Instituto de Investigação e Inovação em Saúde, University of Porto, 4200-135 Porto, Portugal

<sup>2</sup> Cancer Drug Resistance Group, IPATIMUP—Institute of Molecular Pathology and Immunology of the University of Porto, 4200-135 Porto, Portugal

<sup>3</sup> Clinical Hematology, Hospital Center of São João, 4200-319 Porto, Portugal

<sup>4</sup> Clinical Hematology, FMUP—Faculty of Medicine of the University of Porto, 4200-319 Porto, Portugal

<sup>5</sup> Research Innovation Unit, Translational Research & Industry Partnerships Office, i3S—Instituto de Investigação e Inovação em Saúde, University of Porto, 4200-135 Porto, Portugal

<sup>6</sup> Instituto Universitário de Ciências da Saúde, Cooperativa de Ensino Superior Politécnico e Universitário IUCSESPU, 4585-116 Gandra-Paredes, Portugal

<sup>7</sup> Department of Biological Sciences, FFUP—Faculty of Pharmacy of the University of Porto, 4050-313 Porto, Portugal

\* Correspondence: jeteiguimaraes@gmail.com (J.E.G.); hvasconcelos@ipatimup.pt (M.H.V.); Tel.: +351-225-570-772 (J.E.G. & M.H.V.)

## Supplementary tables

**Supplementary Table S1.** Analyzed EV markers and protein contaminants and their respective antibody dilutions.

| Protein      | Reference              | Dilution factor | Expected Molecular Weight (KDa) |
|--------------|------------------------|-----------------|---------------------------------|
| Actinin 4    | GTX113116 (GeneTex)    | 1:500           | 105                             |
| Albumin      | sc-271605 (Santa Cruz) | 1:100           | 66                              |
| Alix         | sc-49268 (Santa Cruz)  | 1:400           | 95                              |
| Annexin XI   | sc-46686 (Santa Cruz)  | 1:100           | 50-56                           |
| ApoA-I       | sc-376818 (Santa Cruz) | 1:100           | 28                              |
| ApoB         | sc-393636 (Santa Cruz) | 1:100           | 512                             |
| CD63         | sc-5275 (Santa Cruz)   | 1:200           | 26-60                           |
| CD81         | sc-7637 (Santa Cruz)   | 1:200           | 22-26                           |
| CD9          | sc-13118 (Santa Cruz)  | 1:200           | 24                              |
| Cytochrome C | sc-13560 (Santa Cruz)  | 1:200           | 15                              |

|            |                        |       |       |
|------------|------------------------|-------|-------|
| HSP70      | sc-66048 (Santa Cruz)  | 1:200 | 70    |
| Mitofilin  | sc-390707 (Santa Cruz) | 1:100 | 88/90 |
| Syntenin-1 | sc-100336 (Santa Cruz) | 1:200 | 33    |
| TSG101     | sc-136111 (Santa Cruz) | 1:200 | 45    |

**Supplementary Table S2:** Secondary Antibodies and their respective dilution factors.

| Antibody    | Reference              | Dilution Factor |
|-------------|------------------------|-----------------|
| Anti-mouse  | NA931V (GE Healthcare) | 1:2000          |
| Anti-goat   | sc-2354 (Santa Cruz)   | 1:2000          |
| Anti-rabbit | NA934V (GE Healthcare) | 1:2000          |

**Supplementary Table S3:** Analyzed Multiple Myeloma Markers and their respective antibody dilutions.

| Protein                 | Reference              | Dilution factor | Expected Molecular Weight (KDa) |
|-------------------------|------------------------|-----------------|---------------------------------|
| CD56 (NCAM)             | sc-7326 (Santa Cruz)   | 1:200           | 110-180                         |
| CD79B                   | Sc-18902 (Santa Cruz)  | 1:200           | 39                              |
| CD117 (c-kit)           | sc-17806 (Santa Cruz)  | 1:100           | 120/145                         |
| CD138 (Syndecan-1)      | sc-12765 (Santa Cruz)  | 1:200           | 85                              |
| CD38                    | sc-374650 (Santa Cruz) | 1:100           | 45                              |
| HLA-DR                  | sc-53319 (Santa Cruz)  | 1:200           | 27/36                           |
| CD45                    | sc-1178 (Santa Cruz)   | 1:200           | 180-220                         |
| CD19                    | sc-373897 (Santa Cruz) | 1:100           | 95                              |
| CD28                    | sc-70612 (Santa Cruz)  | 1:200           | 44                              |
| Ig λ chain [EPR5367-62] | ab124719 (abcam)       | 1:20000         | 25                              |
| Ig κ chain              | sc-59265 (Santa Cruz)  | 1:200           | 28                              |
| CD44 (HCAM)             | sc-9960 (Santa Cruz)   | 1:200           | 90-95                           |
| CD20                    | sc-393894 (Santa Cruz) | 1:100           | 33-37                           |
| CD27                    | sc-25289 (Santa Cruz)  | 1:150           | 55                              |

**Supplementary Table S4:** Expected and observed Molecular weights for the bands of the Multiple Myeloma and Minimal Residual Disease protein Markers, analyzed in both human samples and in cell lines of hematological malignancies. n.d. – not detected

| Protein    | Expected Weight (KDa) | Observed Molecular Weight (KDa) |            |
|------------|-----------------------|---------------------------------|------------|
|            |                       | Human Samples                   | Cell Lines |
| CD56       | 110-180               | 100-220                         | 150-250+   |
| CD45       | 80-220                | 150-250                         | 200-250    |
| CD117      | 120-145               | 100-200                         | n.d.       |
| CD19       | 95                    | 70-95                           | 70-95      |
| CD138      | 85                    | 70-85                           | 70-100     |
| CD27       | 55                    | 45-55                           | 50         |
| CD38       | 45                    | 40-55                           | 45         |
| CD20       | 33-37                 | 25-33                           | 25         |
| HLA-DR     | 27-36                 | 25-36                           | 25-37      |
| Ig κ Chain | 28                    | 25-28                           | 25         |
| Ig λ Chain | 25                    | 20-25                           | 20-25      |

## Supplementary Figures

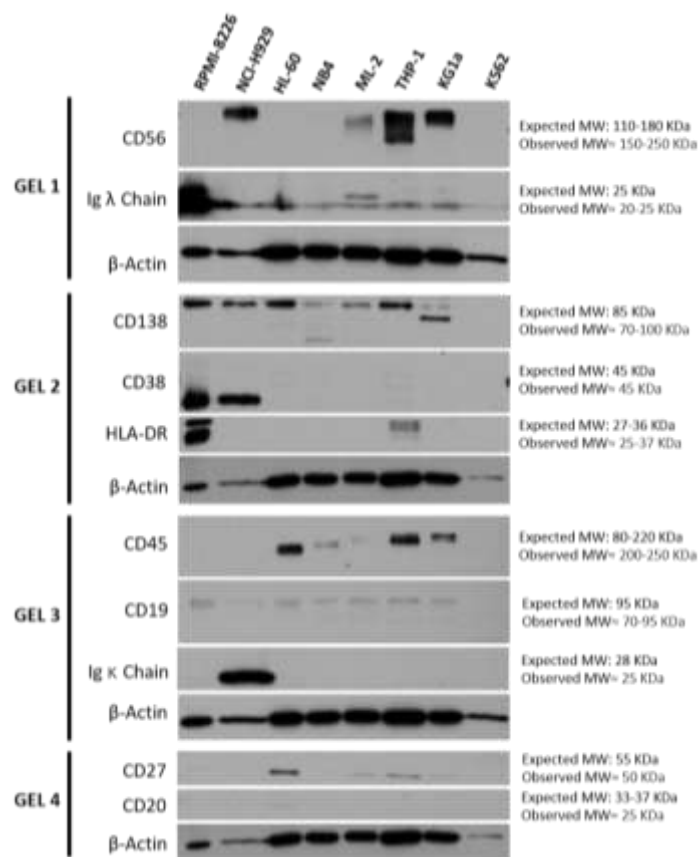

**Supplementary Figure S1:** Analysis of Multiple Myeloma (MM) and Minimal Residual Disease (MRD) protein Markers in cell lines of hematological malignancies. Different markers of MM and MRD were analyzed by WB in cell lysates of several cell lines of hematological malignancies. Actin staining was used as loading control. The molecular weight (MW) of the bands is shown in kDa on the right side of the blots.
